# Supplementary material for: Optimization of Osteosynthesis Positioning in Mandibular Body Fracture Management using Numerical Finite Element Method Simulation and Polymeric Model Testing
Source: Research Square preprint supplement (doi:10.21203/rs.3.rs-449446/v1), 2021-04-28
Supplement: Supplementary file 1 [file cf1b5f77e2ad418335ef9527.docx]

| **a**  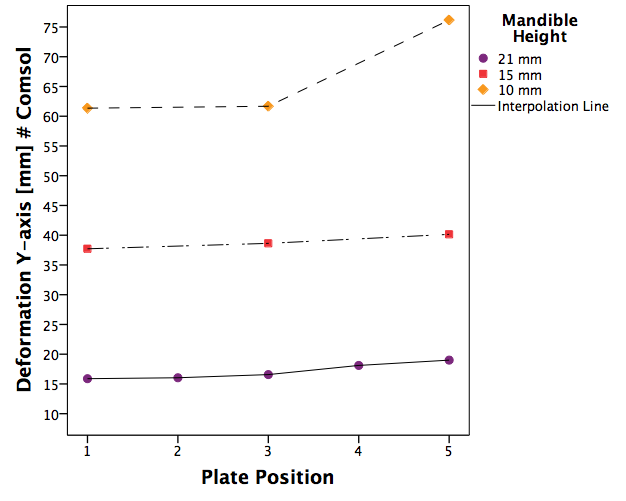 |
| --- |
| **b**  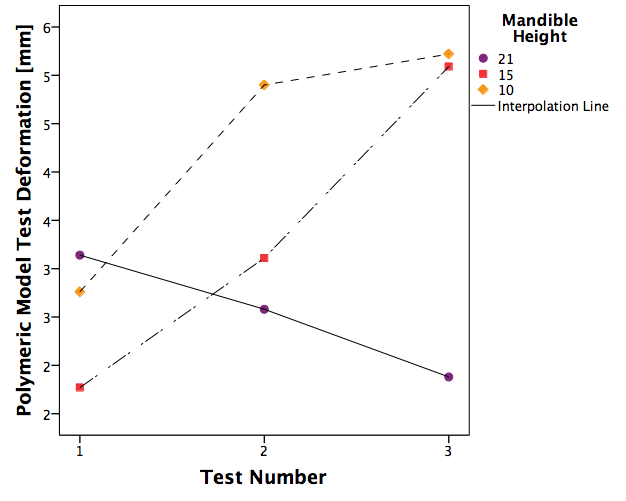 |

**Supplementary Figure 1.** (a) FEM deformation in the Y-axis in mm based on the outcomes from table 1. (b) Polymeric model testing deformation in mm at 150 N force from table 2.
